1 **c-Myc Represses Transcription of the Epstein-Barr Virus Latent Membrane Protein 1**  
2 **Early After Primary B Cell Infection**

3 Running Title: c-Myc represses EBV LMP1 transcription (38/54 Characters)

4 Alexander M. Price\*<sup>1</sup>, Joshua E. Messinger<sup>1</sup>, and Micah A. Luftig<sup>#</sup>

5 Department of Molecular Genetics and Microbiology, Duke Center for Virology, Duke University  
6 School of Medicine

7 \*Present address: Pathology and Laboratory Medicine, The Children's Hospital of Philadelphia

8 <sup>1</sup>These authors contributed equally to this work

9

10 <sup>#</sup>Corresponding author: Micah Luftig

11 [Micah.luftig@duke.edu](mailto:Micah.luftig@duke.edu)

12 Phone: 919-668-3091

## 13 **ABSTRACT**

14           Recent evidence has shown that the EBV oncogene LMP1 is not expressed at high levels  
15 early after EBV-infection of primary B cells, despite its being essential for the long-term outgrowth  
16 of immortalized lymphoblastoid cell lines (LCLs). In this study, we found that expression of LMP1  
17 increased fifty-fold between seven days post infection and the LCL state. Metabolic labeling of  
18 nascently transcribed mRNA indicated this was primarily a transcription-mediated event. EBNA2,  
19 the key viral transcription factor regulating LMP1, and CTCF, an important chromatin insulator,  
20 were recruited to the LMP1 locus similarly early and late after infection. However, the activating  
21 histone H3K9Ac mark was enriched at the LMP1 promoter in LCLs relative to early-infected B  
22 cells. We found that high c-Myc activity in EBV-infected lymphoma cells as well as overexpression  
23 of c-Myc in an LCL model system repressed LMP1 transcription. Finally, we found that chemical  
24 inhibition of c-Myc expression both in LCLs and early after primary B-cell infection increased  
25 LMP1 expression. These data support a model in which high levels of endogenous c-Myc activity  
26 induced early after primary B-cell infection directly represses LMP1 transcription.

## 27 **IMPORTANCE**

28           EBV is a highly successful pathogen that latently infects greater than 90% of adults  
29 worldwide and is also causally associated with a number of B-cell malignancies. EBV expresses  
30 a set of viral oncoproteins and non-coding RNAs during the latent life cycle with the potential to  
31 promote cancer. Critical among these is the viral latent membrane protein, LMP1. Prior work  
32 suggests that LMP1 is essential for EBV to immortalize B cells, but our recent work indicates that  
33 LMP1 is not produced at high levels during the first few weeks after infection. Here, we show that  
34 the transcription of LMP1 can be negatively regulated by a host transcription factor, c-Myc.  
35 Ultimately, understanding the regulation of EBV-encoded oncogenes will allow us to better treat  
36 cancers that rely on these viral products for survival.

## 37 INTRODUCTION

38 Epstein-Barr virus (EBV) infection of primary human B cells leads to their immortalization,  
39 or growth transformation (1). These immortalized cells, called lymphoblastoid cell lines (LCLs),  
40 are latently infected by EBV and express a program, called latency III, consisting of nine viral  
41 proteins and many non-coding RNAs. LCLs expressing Latency III genes are a model system for  
42 EBV-associated malignancies such as Post-Transplant Lymphoproliferative Disease (PTLD) and  
43 Diffuse Large B Cell Lymphoma (DLBCL) (1). Characteristic of Latency III is expression of the  
44 essential viral oncogene latent membrane protein 1 (LMP1), which is a constitutively active TNF  
45 receptor homologue that induces the host NF $\kappa$ B and AP-1 signaling pathways to promote survival  
46 (2-5). LMP1 is both necessary for EBV immortalization of primary human B cells and sufficient to  
47 induce lymphomas when expressed in the murine B cell compartment (6, 7). The regions of the  
48 LMP1 cytoplasmic tail that engage TNFR associated factors (TRAFs) and TNFR associated death  
49 domain (TRADD) responsible for NF $\kappa$ B activation are coincident with the regions required for  
50 EBV-mediated immortalization (8, 9). LCLs are functionally addicted to the NF $\kappa$ B signaling  
51 induced by LMP1 as inhibition of this pathway results in apoptosis (3).

52 Studies of LMP1 transcriptional regulation have defined cis-acting elements and trans-  
53 acting factors important in controlling its expression. In epithelial cells, LMP1 expression is driven  
54 by a unique promoter found within the viral terminal repeats (10, 11). However, transcription of  
55 LMP1 in Latency III expressing B cells is initiated at a bi-directional LMP1/LMP2B promoter (12).  
56 The critical activator of this Latency III promoter is Epstein-Barr Nuclear Antigen 2 (EBNA2), which  
57 binds to a so-called EBNA2-response element (E2RE) through the host factors RBP-J $\kappa$  and PU.1  
58 (13, 14). Other viral factors, such as EBNA3C, have also been shown to aid in the transcription  
59 of LMP1 (15, 16). Additionally, a number of host factors have been shown to fine-tune LMP1  
60 transcription, including ATF4 (17, 18), IRF7 (19), and NF $\kappa$ B subunits themselves (20, 21). In fact,  
61 host factors often lead to auto-regulatory feedback loops that maintain the levels of LMP1

62 expression, whether it is NF $\kappa$ B in B cells (20) or STAT signaling on the terminal repeat promoter  
63 in epithelial cells (22). Furthermore, the epigenetic state of the LMP1 promoter plays a key role in  
64 transcription. Changes in cell type and latency state alter the prevalence of active and repressive  
65 histone marks on the LMP1 promoter as well as CpG DNA methylation (23). In addition, viral  
66 chromatin architecture and enhancer looping mediated by host factors such as CTCF and Rad21  
67 play a direct role in the full activation of LMP1 (24).

68 LMP1 mRNA is also post-transcriptionally regulated to control protein output. While LMP1  
69 is one of the most abundant viral transcripts detected in latently infected cells, it is transcribed at  
70 a much lower rate implying a certain level of mRNA stability (25). This stability can be  
71 counteracted by micro-RNA (miRNA) targeting of the long LMP1 3' untranslated region. LMP1  
72 can be targeted by both EBV-encoded viral miRNAs such as miR-BART1-5p, miR-BART16-3p,  
73 and miR-BART17-5p (26) as well as a number of host miRNAs (27). Of these host miRNAs,  
74 inhibiting the c-Myc regulated miR17~92 miRNA cluster led to an upregulation of LMP1 protein  
75 levels and slowed cell growth (27). This slowed growth could be explained in part by the known  
76 ability of overexpressed LMP1 to be cytostatic (28-30).

77 The cellular oncogene c-Myc is overexpressed in a wide variety of cancers, including EBV-  
78 associated Burkitt lymphoma where c-Myc is expressed at high levels due to a characteristic  
79 chromosomal 8:14 translocation. Additionally, EBV induces c-Myc expression upon infection of B  
80 cells by utilizing EBNA2 to co-opt native super-enhancer architecture upstream of c-Myc (31).  
81 Upon *de novo* infection, c-Myc levels peak within the first week after infection, then wane, but  
82 remain elevated throughout LCL outgrowth where c-Myc is crucial for the maintenance of the LCL  
83 phenotype (32, 33). This conflicts with the NF $\kappa$ B addiction observed in LCLs, as the c-Myc and  
84 NF $\kappa$ B signaling pathways have been shown to be directly incompatible (34).

85           We have previously shown that, despite being detectable early after infection of primary  
86 B cells, LMP1 does not reach LCL levels of expression until greater than two weeks post infection  
87 (35). These EBV-infected cells express EBNA2, proliferate, and show no signs of apoptosis even  
88 when NF $\kappa$ B is inhibited during the first weeks of infection (35, 36). Furthermore, the exact role of  
89 LMP1 in the EBV life cycle has been called into question by recent work showing that LMP1 is  
90 dispensable for tumor formation in a humanized mouse model (37, 38). In this work, we address  
91 the question of how LMP1 is delayed in expression from early to late times after primary B-cell  
92 infection. We investigate the nature of the mRNA change and the role of cellular factors in  
93 temporal regulation of LMP1 expression.

94

## 95 RESULTS

96 **LMP1 transcription is robustly increased from early to late times after primary B cell**  
97 **infection.** LMP1 mRNA and protein levels and, consequently, NF $\kappa$ B targets are significantly lower  
98 during the first two weeks following EBV infection of primary B cells relative to that found in  
99 immortalized lymphoblastoid cell lines (LCLs) (35). Prior studies indicate that the LMP1 mRNA is  
100 the most abundant latency transcript in LCLs despite being poorly transcribed (25). Therefore, to  
101 determine the mechanism for low LMP1 mRNA levels at early times after infection, we assayed  
102 the relative transcription rate and half-life using a 4-thiouridine (4sU) metabolic labeling approach  
103 (**Fig. 1A** and (39)). This was performed by using Fluorescence Activated Cell Sorting (FACS) to  
104 generate a pure population of proliferating (Celltrace Violet<sup>o</sup>) EBV-infected B cells six days after  
105 primary human Peripheral Blood Mononuclear Cell (PBMC) infection and allowing the cells to rest  
106 overnight. Twenty-four hours later (Day 7 post infection), cells were pulsed with 4sU for exactly  
107 one hour before total RNA was harvested. The process was repeated for LCLs that grew out from  
108 matched PBMC donors five weeks post infection. As previously observed, the total LMP1 mRNA  
109 level increased ~50-fold from day 7 post infection through LCL outgrowth (**Fig. 1B**). Comparing  
110 the ratio of 4sU labeled nascent RNA and unlabeled decaying RNA (39), we found that the half-  
111 life of the LMP1 mRNA increased two-fold between early and late times after infection from ~2  
112 hours at 7 days post infection to ~4 hours in LCLs (**Fig. 1C**). Over the same time frame the relative  
113 transcription rate of LMP1 mRNA increased nearly 25-fold (**Fig. 1D**). We also queried the EBNA2-  
114 specific mRNA as well as Cp-derived EBNA transcripts and found only modest differences in their  
115 overall expression, transcription rate, or stability through B cell outgrowth (**Fig. 1B-D**).

116 **The LMP1 locus is occupied by EBNA2 and CTCF similarly early and late after infection;**  
117 **however lower levels of activated histones are detected early.** In B cells, the transcription of  
118 LMP1 is regulated by EBNA2 (40). Prior work indicates that EBNA2-regulated genes, including c-  
119 Myc and CD23, are induced to higher levels at day 7 post infection than in LCLs suggesting that

120 EBNA2 activity is not broadly suppressed during early infection (32). However, it remained a  
121 possibility that LMP1 expression was low during early infection because of poor EBNA2  
122 recruitment to the bi-directional LMP1/2B promoter. To address this, we performed Chromatin  
123 Immuno-precipitation (ChIP) for EBNA2 at day 7 post infection and in LCLs. LMP1 and LMP2 are  
124 transcribed from a complex and overlapping region of the EBV episome near the terminal repeats  
125 (TR), diagrammed in **Fig. 2A**. We found that EBNA2 was recruited comparably to the LMP1  
126 promoter and the viral C promoter both early after infection and in LCLs (**Fig. 2B**). A region in the  
127 gene body of EBNA3C distal to both the LMP1p and the Cp was used as a negative control (**Fig.**  
128 **2B**). Similarly, EBNA2 was recruited to the two major c-Myc upstream enhancer loci (31) as well  
129 as the CD23 promoter comparably at 7 days post infection as in LCLs (**Fig. 2C**). Despite the lack  
130 of change in EBNA2 occupancy at early and late times post infection, the activating histone mark  
131 H3K9 Acetyl was enriched at the LMP1p in LCLs, correlating with the observed increased level  
132 of transcription (**Fig. 2D**). A recent publication has implicated the chromatin architecture mediated  
133 by CTCF at a single CTCF site downstream of LMP1 (here called the CTCF-Response Element)  
134 to be important for H3K9 Acetylation and transcription at the LMP1 promoter (24). We assayed  
135 for CTCF-occupancy at both this CTCF-RE as well as the EBV enhancer found in the EBER/OriP  
136 region of the genome and found that CTCF occupancy did not change between day 7 post  
137 infection cells and LCLs (**Fig. 2E**).

138 **c-Myc suppresses LMP1 transcription.** Despite EBNA2 recruitment to the LMP1 promoter,  
139 reduced H3K9 acetylation suggested poor LMP1 transcription. Early after infection when LMP1  
140 expression is lowest, c-Myc is strongly activated by EBNA2, and during the time frame that LMP1  
141 expression increases the expression of c-Myc and its targets are subsequently attenuated (32).  
142 Given this correlation, we sought to test the role of c-Myc in the regulation of LMP1 expression.  
143 We first assayed LMP1 transcription using 4sU labeling in EBV-infected Burkitt lymphoma (BL)  
144 cell lines that express very high levels of c-Myc relative to LCLs. We found that LMP1 mRNA and

145 protein levels were higher in LCLs than in EBV-infected BL41 cells (**Fig. 3A-B**). Consistent with  
146 our hypothesis, the transcription of LMP1 was significantly lower in EBV-infected BL41 cells  
147 relative to LCLs (**Fig. 3C**).

148 To directly assess the effect of c-Myc on LMP1 transcription in an LCL, we used the P493-  
149 6 model of c-Myc and EBNA2 regulation (41, 42). In this system, EBNA2 (encoded endogenously  
150 from the viral genome) is controlled post-translationally by Estrogen ( $\beta$ -Estradiol) due to its fusion  
151 to a modified estrogen receptor, and heterologous c-Myc expression is provided *in trans* and  
152 controlled transcriptionally through a tetracycline (tet-off) system. We verified that induction of  
153 EBNA2 and inactivation of c-Myc (Estrogen+, Tetracycline+) led to an LCL-like phenotype with  
154 high levels of LMP1 transcription (**Fig. 4A**). However, when removing EBNA2 activity (Estrogen-  
155 , Tetracycline-) or inducing EBNA2 in the presence of high levels of c-Myc (Estrogen+,  
156 Tetracycline-), we observed blunted endogenous LMP1 transcription relative to that induced in  
157 the presence of low levels of c-Myc (**Fig. 4A**). These changes in transcription correlated with the  
158 levels of total LMP1 mRNA and protein (**Fig. 4B-C**), while EBNA2-ER transcription from the  
159 endogenous Cp was not affected by c-Myc overexpression (**Fig. 4B**). This controlled experiment  
160 indicated that c-Myc overexpression is sufficient to suppress LMP1 transcription in an LCL and  
161 suggested that c-Myc may be critical for suppression of LMP1 transcription early after primary B-  
162 cell infection as well.

163 **c-Myc suppresses LMP1 expression early after primary B-cell infection.** To test the  
164 hypothesis that c-Myc is responsible for LMP1 suppression early after infection, we chose to  
165 target c-Myc pharmacologically given the intractability of reverse genetic experiments in primary  
166 human B cells. The expression of c-Myc is exquisitely sensitivity to inhibition of bromodomain and  
167 extra-terminal motif (BET) domain containing transcriptional activators including Brd4 (43, 44).  
168 Therefore, we used two independent BET inhibitors, JQ1 and OTX015, to suppress c-Myc and  
169 assay LMP1 transcription in EBV-infected cells. First, we treated LCLs with the BET inhibitors and



170 found that c-Myc mRNA levels decreased and LMP1 mRNA levels increased in a dose-dependent  
171 manner (**Fig. 5A-B**). We next treated EBV-infected PBMCs 7 days post infection with BET  
172 inhibitors. Consistently, we observed a dose-dependent decrease in c-Myc mRNA and increase  
173 in LMP1 mRNA following both JQ1 and OTX015 treatment (**Fig. 5C-D**). Therefore, c-Myc activity  
174 negatively correlates with LMP1 expression both early and late after infection.

## 175 **DISCUSSION**

176 In this study, we determined that transcription of the EBV major latent oncoprotein, LMP1,  
177 is suppressed by c-Myc early after primary B cell infection. Transcription of LMP1 increased  
178 twenty-five-fold from day 7 to LCL, while the mRNA half-life increased two-fold, leading to an  
179 overall fifty-fold increase in LMP1 expression. This change correlated with an approximate two-  
180 fold increase in the activating histone mark, H3K9Ac, at the LMP1 promoter, but the occupancy  
181 of the major LMP1 trans-activator EBNA2, as well as CTCF-binding to the CTCF-RE, did not  
182 change over the same time period. Furthermore, cellular c-Myc was shown to negatively regulate  
183 LMP1 transcription and total LMP1 RNA levels in both the setting of highly expressed endogenous  
184 c-Myc in a Burkitt lymphoma cell line as well as direct c-Myc overexpression in an LCL. Finally,  
185 inactivating c-Myc expression with either of the BRD4-inhibiting compounds, JQ1 or OTX015, led  
186 to a dose dependent increase in LMP1 expression both in LCLs and early after primary infection  
187 of B cells.

188 The small but significant change in LMP1 half-life could be explained as a post-  
189 transcriptional effect mediated by miRNAs that are known to target the LMP1 3'UTR. Previous  
190 work has shown that the miR17~92 family of c-Myc-induced miRNAs target LMP1 and removal  
191 of this miRNA family increased LMP1 protein production (27). Furthermore, our group has shown  
192 that miR17~92 are expressed at the highest levels early after infection when LMP1 mRNA and  
193 mRNA half-life is lowest (45). This low level "fine-tuning" of LMP1 expression might be critical in

194 the immortalized state when high levels of LMP1 can lead to cytostatic effects on cell growth (28,  
195 30).

196 While the LMP1 promoter has been extensively studied in the immortalized LCL, no one  
197 has previously characterized promoter occupancy early after infection. We have shown that early  
198 after infection EBNA2 is recruited normally to its response element in the LMP1 promoter as well  
199 as several canonical cellular targets including CD23 and c-Myc. This implies that there must be a  
200 repressive element present in the LMP1p that supersedes the E2RE's function at early times after  
201 infection. Such an element has been characterized in Burkitt lymphoma cell lines, and it is  
202 responsive to members of the Myc family including MAD1 and MAX (46). Alternatively, c-Myc  
203 activation could lead to decreased LMP1p occupancy and transcription through less direct  
204 mechanisms. Previously c-Myc signaling and NF $\kappa$ B signaling have been shown to activate  
205 opposing and mutually exclusive growth programs (34). In this way, direct actions of c-Myc or  
206 indirect actions of Myc-induced target genes might lead to less active NF $\kappa$ B transcriptional  
207 subunits that can no longer auto-regulate and act in a feed-forward manner on the LMP1p (20).

208 Many questions still remain regarding the functional relevance for EBV in delaying LMP1  
209 expression. While still important for survival at late stages during infection, it has been shown that  
210 EBV can protect B cells from apoptosis in the absence of NF $\kappa$ B activity by activating the anti-  
211 apoptotic cellular MCL-1 protein using EBNA3A (36). Additionally, our group has shown that  
212 exogenously activating NF $\kappa$ B during the early stage after infection when LMP1 is low increases  
213 the transformation rate of the virus (35). However, if the ability of c-Myc to downregulate LMP1  
214 expression was detrimental, one would assume that the virus would evolve to lack such  
215 constraints.

216 Alternatively, we propose c-Myc repression of LMP1 may be beneficial in the life cycle of  
217 EBV to maintain low levels of LMP1-induced NF $\kappa$ B early after infection. It has been shown that c-

218 Myc overexpression suppresses recognition of EBV-infected cells by CD8+ T cells (47, 48). In  
219 contrast, NF $\kappa$ B activity is known to enhance MHC-mediated antigen presentation, making LCLs  
220 excellent targets for CD8+ T cell killing (49). Thus, NF $\kappa$ B activation in EBV-infected B cells in an  
221 immune-competent host might ride a fine line between survival and immune recognition. Given  
222 our data, we propose that early EBV-infected B cells with high c-Myc and low NF $\kappa$ B activity  
223 provide an ideal setting to escape CD8+ T-cell recognition. This is particularly important in sero-  
224 positive individuals where reactivation and *de novo* naïve B-cell infection is thought to occur in  
225 the setting of a robust CD8+ T-cell response. The re-seeding of the latency reservoir from these  
226 naïve-infected cells into the memory B-cell compartment would then proceed with attenuated  
227 MHC presentation of viral antigens. Therefore, c-Myc-suppressed LMP1/NF $\kappa$ B activity together  
228 with the recently described EBV miRNA-mediated attenuation of T-cell recognition and killing (50,  
229 51) are likely the key elements of latent EBV-mediated immune evasion in the immune-competent  
230 host.

231

232

## 233 **MATERIALS AND METHODS**

### 234 **Cell lines, culture conditions, and viruses**

235 Buffy coats were obtained from normal human donors through the Gulf Coast Regional  
236 Blood Center (Houston, TX) and peripheral blood mononuclear cells (PBMCs) were isolated by  
237 Ficoll Histopaque-1077 gradient (Sigma, H8889). B95-8 strain of Epstein-Barr virus was produced  
238 from the B95-8 Z-HT cell line as previously described (52). Virus infections were performed in  
239 bulk by adding 50  $\mu$ L of filtered B95-8 supernatant to  $1 \times 10^6$  PBMCs.

240 Cell lines were cultured in RPMI 1640 media supplemented with 10-15% heat inactivated  
241 fetal bovine serum (Corning), 2 mM L-Glutamine, 100 U/ml penicillin, 100  $\mu$ g/ml streptomycin  
242 (Invitrogen), and 0.5  $\mu$ g/mL Cyclosporine A (Sigma). P493-6 cells (a kind gift of Dr. Georg  
243 Bornkamm, Helmholtz Zentrum München) were cultured with 10% tetracycline-free FBS (Hyclone  
244 SH30070), 1  $\mu$ M  $\beta$ -Estradiol, and 1  $\mu$ g/mL Tetracycline. All cells were cultured at 37°C in a  
245 humidified incubator at 5% CO<sub>2</sub>.

### 246 **Flow cytometry and sorting**

247 To track proliferation, cells were stained with CellTrace Violet (Invitrogen, C34557), a  
248 fluorescent proliferation-tracking dye. Cells were first washed in FACS buffer (5% FBS in PBS),  
249 stained with the appropriate antibody for 30min-1hr at 4°C in the dark, and then washed again  
250 before being analyzed on a BD FACS Canto II.

251 Proliferating infected B cells were sorted to a pure population of CD19<sup>+</sup>/CellTraceViolet<sup>lo</sup>  
252 on a MoFlo Astrios Cell Sorter at the Duke Cancer Institute Flow Cytometry Shared Resource.  
253 Mouse anti-human CD19 antibody (clone 33-6-6; gift from Tom Tedder, Duke University Medical  
254 School) conjugated with either APC or PE was used as a surface B cell marker in flow cytometry.

255

## 256 **Nascent RNA extraction and profiling**

257 To assess both mRNA transcription and half-life cells were treated with 4-thiouridine (4sU,  
258 Sigma) (200  $\mu$ M) for exactly one hour. Upon harvesting, total RNA was extracted via TRIzol  
259 following the manufacturer's protocol (Life Technologies). 4sU-labelled nascent RNA was then  
260 biotinylated using a highly efficient crosslinking reaction using EZ-Link Biotin-HPDP (Pierce)  
261 dissolved in DMSO at a concentration of 1 mg/mL or MTSEA Biotin-XX (Biotium Cat# 90066) at  
262 20 ng/ $\mu$ L dissolved in DMSO, and labeled RNA was separated from the total population using  
263 streptavidin MyOne C1 Dynabeads (Invitrogen) as previously described (39). Subsequently, three  
264 populations of RNA were reverse transcribed into cDNA using the High Capacity cDNA kit  
265 (Applied Biosystems): total RNA (T), unlabeled RNA (U), and nascent RNA (N). Quantitative real-  
266 time PCR was then performed on these three populations to discover total RNA abundance,  
267 relative transcription rates, and mRNA half-life as previously described (53). In brief, the  
268 abundance of mRNA was represented by the measurement of the total RNA sample (*T*). Relative  
269 transcription was represented by the labeled fraction of mRNA (*N*). The decay rate (*DR*) was  
270 calculated from measurements of nascent (*N*) and unlabeled (*U*) mRNA, as a function of *N/U*-  
271  $\ln(1 - N/U)$ . An apparent RNA half-life was calculated using the decay rate,  $-t \times [\ln(2)/DR]$ , where  
272 *t* is the time of 4sU incorporation (1 h for the purposes of these experiments). Two assumptions  
273 of this method are that transcription and stability are constant over the period of measurement.

## 274 **Chromatin Immunoprecipitation**

275 Chromatin Immunoprecipitation was performed using ChIP-IT High Sensitivity kit using the  
276 manufactures directions (Active Motif). DNA was sonicated for 45 min with 30 second on/off  
277 cycles on a Bioruptor (Diagenode). ChIP antibodies include EBNA2 (PE2; gift from Elliot Kieff),  
278 H3K9ac (Active Motif cat # 51252 Clone 1B10) and CTCF (Active Motif cat #61311). Quantitative  
279 real-time PCR primer sets include the C promoter (F: CCTAGGCCAGCCAGAGATAAT, R:

280 AGATAGCACTCGACGCACTG), LMP1 promoter (F: GGCCAAGTGCAACAGGAA, R:  
281 GCAGATTACACTGCCGCTTC), c-Myc Enhancer 525 kb upstream (F:  
282 CTAGTAGCAGGTGATGGGTTATG, R: CCTTTGGACCAGAAGAGGATG), c-Myc Enhancer 432  
283 kb upstream (F: ACAGCCAGAGGTATTGGAAC, R: GGAAGGAACGAAACCCTAGAA), CD23  
284 promoter (F: GATCGGCCATAGTGGTATGATT, R: CTCAGGTAAGAGAATTGGGTGAG), CTCF-  
285 RE (F: CCACTAGGAACCCAAGATCAA, R: GCCCGCTTCTTCGTATATGT), and EBER/OriP (F:  
286 GGGAAATGAGGGTTAGCATAGG, R: CAAGTCTACATCTCCTCAAGACAG. As a negative  
287 control for the EBV genome EBNA3C (F: CAAGGTGCATTTACCCCACTG and R:  
288 GGGCAGGTCCGTGAGAACT) was used. As negative controls from the human genome two  
289 regions Neg1 (F: CCAATAACAGAAGCATTAAAATTCA, R: TTCAAGCACAGGCATACAGG) and  
290 Neg2 (F: TCTCTGGGGAGATGGATTACA, R: CGTGAATCCTTTATTCTTGGA) were used.

## 291 **Gene Expression Analysis**

292 Total RNA was isolated from cells by using a Qiagen RNeasy kit and then reverse  
293 transcribed to generate cDNA with the High Capacity cDNA kit (Applied Biosystems). Quantitative  
294 PCR was performed by using SYBR green (Quanta Biosciences) in an Applied Biosystems Step  
295 One Plus instrument. Primer sets include c-Myc (F: CTCCATGAGGAGACACCGC, R:  
296 GAGCCTGCCTCTTTTCCACA), LMP1 (F: AATTTGCACGGACAGGCATT, R:  
297 AAGGCCAAAAGCTGCCAGAT), EBNA2 (F: GCTTAGCCAGTAACCCAGCACT, R:  
298 TGCTTAGAAGGTTGTTGGCATG), GAPDH (F: TGCACCACCAACTGCTTAGC, R:  
299 GGCATGGACTGTGGTCATGAG) and SETDB1 (F: TCCATGGCATGGTGGAGCGG, R:  
300 GAGAGGGTTCTTGCCCCGGT).

## 301 **Western blot**

302 Cells were pelleted and washed in PBS, and then lysed in 0.1% Triton-containing buffer  
303 with Complete protease inhibitors. All protein lysates were run on NuPage 4–12% gradient gels

304 (LifeTechnology) and transferred to PVDF membrane (GE Healthcare). Membranes were blocked  
305 in 5% milk in TBST and stained with primary antibody overnight at +4°C, followed by a wash and  
306 staining with secondary HRP-conjugated antibody for 1 hour at room temperature. Antibodies  
307 include LMP1 (S12; gift from Elliot Kieff, Harvard Medical School), c-Myc (Santa Cruz  
308 Biotechnology, SC-764), and GAPDH (BioChain Institute, #Y3322).

### 309 **BRD4 Inhibition**

310 (+)-JQ1 and OTX015 were purchased from Selleckchem (cat. #S7110 and #S7360, respectively).

311 For LCLs:

312 LCLs were seeded at  $3 \times 10^5$ /mL in the presence of either 0.1% DMSO, 100 or 500 nM JQ1 or  
313 100 or 500 nM OTX015 for 24 hours. After 24 hours total mRNA was harvested using the Qiagen  
314 RNeasy mini kit (ref #74104) according to manufacturer's instructions. 1 microgram of harvest  
315 mRNA was reverse transcribed into cDNA using Applied Biosystems High-Capacity cDNA  
316 reverse transcription kit (cat #4368814) according to manufacturer's instructions. RT-qPCR  
317 analysis was performed using SYBR Green detection based system (Quanta Bio cat #95072-  
318 05K) with 5 ng of cDNA used per reaction using an Applied Biosystems StepOne Plus Real Time  
319 PCR System. All values were normalized to the endogenous loading control SETDB1. Relative  
320 expression values were calculated using the  $\Delta\Delta$ CT method.

321 For PBMCs:

322 Peripheral Blood Mononuclear Cells (PBMCs) were isolated from whole blood, infected with EBV  
323 B95-8 and seeded at  $1 \times 10^6$ /mL. Seven days post infection the cells were treated with either  
324 0.1% DMSO, 100 or 500 nM JQ1 or 100 or 500 nM OTX015. After 24 hours, total mRNA was  
325 harvested as previously described. 1  $\mu$ g of total RNA was reverse transcribed into cDNA as  
326 previously described. RT-qPCR analysis was conducted as previously described.

327

328 **ACKNOWLEDGMENTS**

329           We thank Lynn Martinek, Nancy Martin, and Mike Cook for extensive help in flow-based  
330 cytometry experiments. Special thanks are due to Jack Keene and Jeff Blackinton for assistance  
331 with 4sU labeling experiments. This work was supported by National Institutes of Health (NIH)  
332 Grants R01-CA140337 and R01-DE025994 (to M.A.L.), F31-CA180451 (to A.M.P), and T32-  
333 CA009111 (to A.M.P. and J.E.M). Additional funding came from the Duke CFAR, an NIH funded  
334 program, 5P30-AI064518, and an American Cancer Society grant RSG-13-228-01-MPC (Both to  
335 M.A.L.).

336



337 **FIGURE LEGENDS**

338 **Figure 1. 4sU metabolic pulsing reveals differences in LMP1 mRNA abundance, half-life**  
339 **and transcription rate at Day 7 compared to LCL** (A) Schematic describing 4sU experiments.  
340 Cells are pulsed for 1 hour with 4sU before RNA isolation by Trizol. 4sU labeled RNA is then  
341 conjugated to biotin and isolated via magnetic streptavidin. Unbound RNA is saved as the “old”  
342 fraction while bound RNA eluted from the beads becomes the “new” fraction. Isolated RNA is then  
343 reverse transcribed for RT-qPCR analysis. (B) RT-qPCR analysis of total mRNA from 4sU  
344 experiments for indicated genes at indicated times post infection. (C) RT-qPCR analysis of mRNA  
345 half-life from 4sU experiments. Half-life is normalized to GAPDH. (D) Transcription rate analysis  
346 of mRNA from 4sU experiments for indicated genes at indicated times post infection. All  
347 transcription rates are relative to GAPDH. For all panels, Cp denotes EBV C promoter transcripts.  
348 Each bar is representative of at least 3 independent donors. Error bars represent SEM. \* denotes  
349  $p < 0.05$ , \*\* denotes  $p < 0.01$  and \*\*\* denotes  $p < 0.001$  by one-tailed pairwise student’s t-test.

350 **Figure 2. Interrogation of the LMP1 locus by ChIP-PCR.** (A) Schematic of the LMP1 genomic  
351 locus. Arrows with half arrow heads denote the location of primers used for ChIP-PCR in (B), (D)  
352 and (E). (B) Sorted Day 7 proliferating primary EBV-infected B cells (black) or fully outgrown (>35  
353 days) LCLs (blue) were harvested for chromatin and ChIP for EBNA2 was performed. LMP1p  
354 denotes the LMP1 promoter, Cp denotes the C promoter and EBNA3C is an EBV genomic  
355 negative control. All samples are normalized to the average of the two negative controls from the  
356 human genome in (C). (C) Same experiment as in (B) but RT-qPCR was performed for regions  
357 of the human genome. Neg1 and Neg2 denote transcription factor deserts within the human  
358 genome serving as a negative control. All samples are normalized to the average of the two  
359 negative controls. (D) Similar experiment as in (B) but ChIP was performed for H3K9ac. All  
360 samples are normalized to EBNA3C. (E) Similar experiments as in (B) but ChIP was performed  
361 for CTCF. CTCF-RE denotes the CTCF binding site in the LMP1 locus (panel A), EBER/OriP

362 denotes a known CTCF binding site by EBER/OriP. For all panels, all bars represent the average  
363 of at least 3 independent donors. All error bars represent SEM.

364 **Figure 3. Increased c-Myc in BL41/B95-8 correlates with decreased LMP1 mRNA**  
365 **abundance, transcription rate and protein.** (A) RT-qPCR analysis for total mRNA from fully  
366 immortalized (>35 days) LCLs or BL41/B95-8 for indicated genes. All values are normalized to  
367 SETDB1. (B) Western blot analysis for indicated proteins in LCL, EBV negative BL41 and BL41  
368 re-infected with EBV, BL41/B95-8. (C) Relative transcription rate from 4sU metabolic labeling of  
369 LMP1 mRNA transcription rate in LCL and BL41/B95-8. All values are relative to GAPDH. For  
370 each panel, each bar is representative of 3 independent donors/experiments. All error bars  
371 represent SEM. \* denotes  $p < 0.05$  and \*\* denotes  $p < 0.01$  by one tailed student's pairwise t-test.

372 **Figure 4. P493-6 system reveals c-Myc inhibits LMP1 transcription and protein expression.**  
373 (A) RT-qPCR analysis of LMP1 mRNA transcription rate from 4sU metabolic labeling experiments  
374 in P493-6 cells in the indicated transcriptional states. All values are normalized to the "LCL" state.  
375 (B) RT-qPCR analysis for total LMP1 and EBNA2 mRNA from 4sU metabolic labeling experiments  
376 in P493-6 cells in the indicated transcriptional states. All values are normalized to the "LCL" state.  
377 (C) Western Blot analysis for LMP1 and c-Myc protein of the P493-6 cells grown in the indicated  
378 transcriptional states. For all panels, each bar is representative of at least 3 independent  
379 experiments. All error bars denote SEM. \*\* denotes  $p < 0.01$  by one tailed student's pairwise t-test.

380 **Figure 5. BET Inhibition results in a dose dependent increase in LMP1 and simultaneous**  
381 **decrease in c-Myc mRNA in both primary EBV infected B cells and LCLs.** (A) LCLs were  
382 treated with the indicated concentrations of either JQ1 or OTX015 or 0.1% DMSO for 24 hours  
383 before total mRNA was harvested for RT-qPCR analysis for c-Myc. (B) Similar experiments as in  
384 (A) but RT-qPCR was performed for LMP1. (C) Peripheral blood mononuclear cells (PBMCs)  
385 were isolated from whole blood and infected with EBV. On day 7, they were treated with the

386 indicated concentrations of JQ1 or OTX015 or 0.1% DMSO for 24 hours before total mRNA was  
387 collected for RT-qPCR analysis for c-Myc. (D) Similar experiments as in (C) but RT-qPCR was  
388 performed for LMP1. For all panels, each bar represents the average of 3 independent donors.  
389 All error bars denote SEM. \* denotes  $p < 0.05$  and \*\* denotes  $p < 0.01$  by one tailed student's  
390 pairwise t-test.

391

## 392 REFERENCES

- 393 1. **Longnecker RM, Kieff E, Cohen JI.** 2013. Epstein-Barr virus p1898-1959. *In* Knipe DM,  
394 Howley PM (ed), *Fields Virology*, 6th ed, vol 2. Lippincott, Williams, and Wilkins,  
395 Philadelphia.
- 396 2. **Mosialos G, Birkenbach M, Yalamanchili R, VanArsdale T, Ware C, Kieff E.** 1995.  
397 The Epstein-Barr virus transforming protein LMP1 engages signaling proteins for the  
398 tumor necrosis factor receptor family. *Cell* **80**:389-399.
- 399 3. **Cahir-McFarland ED, Davidson DM, Schauer SL, Duong J, Kieff E.** 2000. NF-kappa  
400 B inhibition causes spontaneous apoptosis in Epstein-Barr virus-transformed  
401 lymphoblastoid cells. *Proc Natl Acad Sci U S A* **97**:6055-6060.
- 402 4. **Eliopoulos AG, Gallagher NJ, Blake SM, Dawson CW, Young LS.** 1999. Activation of  
403 the p38 mitogen-activated protein kinase pathway by Epstein-Barr virus-encoded latent  
404 membrane protein 1 coregulates interleukin-6 and interleukin-8 production. *J Biol Chem*  
405 **274**:16085-16096.
- 406 5. **Kieser A, Sterz KR.** 2015. The Latent Membrane Protein 1 (LMP1). *Curr Top Microbiol*  
407 *Immunol* **391**:119-149.
- 408 6. **Kaye KM, Izumi KM, Kieff E.** 1993. Epstein-Barr virus latent membrane protein 1 is  
409 essential for B-lymphocyte growth transformation. *Proc Natl Acad Sci U S A* **90**:9150-  
410 9154.
- 411 7. **Kulwichit W, Edwards RH, Davenport EM, Baskar JF, Godfrey V, Raab-Traub N.**  
412 1998. Expression of the Epstein-Barr virus latent membrane protein 1 induces B cell  
413 lymphoma in transgenic mice. *Proc Natl Acad Sci U S A* **95**:11963-11968.
- 414 8. **Kaye KM, Izumi KM, Li H, Johannsen E, Davidson D, Longnecker R, Kieff E.** 1999.  
415 An Epstein-Barr virus that expresses only the first 231 LMP1 amino acids efficiently  
416 initiates primary B-lymphocyte growth transformation. *J Virol* **73**:10525-10530.
- 417 9. **Izumi KM, Kieff ED.** 1997. The Epstein-Barr virus oncogene product latent membrane  
418 protein 1 engages the tumor necrosis factor receptor-associated death domain protein to  
419 mediate B lymphocyte growth transformation and activate NF-kappaB. *Proc Natl Acad*  
420 *Sci U S A* **94**:12592-12597.
- 421 10. **Brooks L, Yao QY, Rickinson AB, Young LS.** 1992. Epstein-Barr virus latent gene  
422 transcription in nasopharyngeal carcinoma cells: coexpression of EBNA1, LMP1, and  
423 LMP2 transcripts. *J Virol* **66**:2689-2697.
- 424 11. **Sadler RH, Raab-Traub N.** 1995. The Epstein-Barr virus 3.5-kilobase latent membrane  
425 protein 1 mRNA initiates from a TATA-Less promoter within the first terminal repeat. *J*  
426 *Virol* **69**:4577-4581.

- 427 12. **Laux G, Economou A, Farrell PJ.** 1989. The terminal protein gene 2 of Epstein-Barr  
428 virus is transcribed from a bidirectional latent promoter region. *J Gen Virol* **70 ( Pt**  
429 **11)**:3079-3084.
- 430 13. **Johannsen E, Koh E, Mosialos G, Tong X, Kieff E, Grossman SR.** 1995. Epstein-  
431 Barr virus nuclear protein 2 transactivation of the latent membrane protein 1 promoter is  
432 mediated by J kappa and PU.1. *J Virol* **69**:253-262.
- 433 14. **Salamon D, Takacs M, Ujvari D, Uhlig J, Wolf H, Minarovits J, Niller HH.** 2001.  
434 Protein-DNA binding and CpG methylation at nucleotide resolution of latency-associated  
435 promoters Qp, Cp, and LMP1p of Epstein-Barr virus. *J Virol* **75**:2584-2596.
- 436 15. **Lin J, Johannsen E, Robertson E, Kieff E.** 2002. Epstein-Barr virus nuclear antigen  
437 3C putative repression domain mediates coactivation of the LMP1 promoter with EBNA-  
438 2. *J Virol* **76**:232-242.
- 439 16. **Jimenez-Ramirez C, Brooks AJ, Forshell LP, Yakimchuk K, Zhao B, Fulgham TZ,**  
440 **Sample CE.** 2006. Epstein-Barr virus EBNA-3C is targeted to and regulates expression  
441 from the bidirectional LMP-1/2B promoter. *J Virol* **80**:11200-11208.
- 442 17. **Sjoblom A, Yang W, Palmqvist L, Jansson A, Rymo L.** 1998. An ATF/CRE element  
443 mediates both EBNA2-dependent and EBNA2-independent activation of the Epstein-  
444 Barr virus LMP1 gene promoter. *J Virol* **72**:1365-1376.
- 445 18. **Pratt ZL, Zhang J, Sugden B.** 2012. The latent membrane protein 1 (LMP1) oncogene  
446 of Epstein-Barr virus can simultaneously induce and inhibit apoptosis in B cells. *Journal*  
447 *of Virology* **86**:4380-4393.
- 448 19. **Ning S, Hahn AM, Huye LE, Pagano JS.** 2003. Interferon regulatory factor 7 regulates  
449 expression of Epstein-Barr virus latent membrane protein 1: a regulatory circuit. *Journal*  
450 *of Virology* **77**:9359-9368.
- 451 20. **Demetriades C, Mosialos G.** 2009. The LMP1 promoter can be transactivated directly  
452 by NF-kappaB. *J Virol* **83**:5269-5277.
- 453 21. **Johansson P, Jansson A, Ruetschi U, Rymo L.** 2009. Nuclear factor-kappaB binds to  
454 the Epstein-Barr Virus LMP1 promoter and upregulates its expression. *J Virol* **83**:1393-  
455 1401.
- 456 22. **Chen H, Hutt-Fletcher L, Cao L, Hayward SD.** 2003. A positive autoregulatory loop of  
457 LMP1 expression and STAT activation in epithelial cells latently infected with Epstein-  
458 Barr virus. *J Virol* **77**:4139-4148.
- 459 23. **Tempera I, Lieberman PM.** 2014. Epigenetic regulation of EBV persistence and  
460 oncogenesis. *Semin Cancer Biol* **26**:22-29.
- 461 24. **Chen HS, Martin KA, Lu F, Lupey LN, Mueller JM, Lieberman PM, Tempera I.** 2014.  
462 Epigenetic deregulation of the LMP1/LMP2 locus of Epstein-Barr virus by mutation of a  
463 single CTCF-cohesin binding site. *J Virol* **88**:1703-1713.
- 464 25. **Sample J, Kieff E.** 1990. Transcription of the Epstein-Barr virus genome during latency  
465 in growth-transformed lymphocytes. *J Virol* **64**:1667-1674.
- 466 26. **Lo AK, To KF, Lo KW, Lung RW, Hui JW, Liao G, Hayward SD.** 2007. Modulation of  
467 LMP1 protein expression by EBV-encoded microRNAs. *Proc Natl Acad Sci U S A*  
468 **104**:16164-16169.
- 469 27. **Skalsky RL, Corcoran DL, Gottwein E, Frank CL, Kang D, Hafner M, Nusbaum JD,**  
470 **Feederle R, Delecluse HJ, Luftig MA, Tuschl T, Ohler U, Cullen BR.** 2012. The viral  
471 and cellular microRNA targetome in lymphoblastoid cell lines. *PLoS Pathog* **8**:e1002484.
- 472 28. **Kaykas A, Sugden B.** 2000. The amino-terminus and membrane-spanning domains of  
473 LMP-1 inhibit cell proliferation. *Oncogene* **19**:1400-1410.
- 474 29. **Liu Y, Wang X, Lo AK, Wong YC, Cheung AL, Tsao SW.** 2002. Latent membrane  
475 protein-1 of Epstein-Barr virus inhibits cell growth and induces sensitivity to cisplatin in  
476 nasopharyngeal carcinoma cells. *Journal of medical virology* **66**:63-69.

- 477 30. **Lam N, Sandberg ML, Sugden B.** 2004. High physiological levels of LMP1 result in  
478 phosphorylation of eIF2 alpha in Epstein-Barr virus-infected cells. *J Virol* **78**:1657-1664.
- 479 31. **Zhao B, Zou J, Wang H, Johannsen E, Peng CW, Quackenbush J, Mar JC, Morton**  
480 **CC, Freedman ML, Blacklow SC, Aster JC, Bernstein BE, Kieff E.** 2011. Epstein-Barr  
481 virus exploits intrinsic B-lymphocyte transcription programs to achieve immortal cell  
482 growth. *Proc Natl Acad Sci U S A* **108**:14902-14907.
- 483 32. **Nikitin PA, Yan CM, Forte E, Bocedi A, Tourigny JP, White RE, Allday MJ, Patel A,**  
484 **Dave SS, Kim W, Hu K, Guo J, Tainter D, Rusyn E, Luftig MA.** 2010. An ATM/Chk2-  
485 mediated DNA damage-responsive signaling pathway suppresses Epstein-Barr virus  
486 transformation of primary human B cells. *Cell Host Microbe* **8**:510-522.
- 487 33. **Ma Y, Walsh MJ, Bernhardt K, Ashbaugh CW, Trudeau SJ, Ashbaugh IY, Jiang S,**  
488 **Jiang C, Zhao B, Root DE, Doench JG, Gewurz BE.** 2017. CRISPR/Cas9 Screens  
489 Reveal Epstein-Barr Virus-Transformed B Cell Host Dependency Factors. *Cell Host*  
490 *Microbe* **21**:580-591 e587.
- 491 34. **Faumont N, Durand-Panteix S, Schlee M, Gromminger S, Schuhmacher M, Holzel**  
492 **M, Laux G, Mailhammer R, Rosenwald A, Staudt LM, Bornkamm GW, Feuillard J.**  
493 2009. c-Myc and Rel/NF-kappaB are the two master transcriptional systems activated in  
494 the latency III program of Epstein-Barr virus-immortalized B cells. *J Virol* **83**:5014-5027.
- 495 35. **Price AM, Tourigny JP, Forte E, Salinas RE, Dave SS, Luftig MA.** 2012. Analysis of  
496 Epstein-Barr Virus-Regulated Host Gene Expression Changes through Primary B-Cell  
497 Outgrowth Reveals Delayed Kinetics of Latent Membrane Protein 1-Mediated NF-  
498 kappaB Activation. *J Virol* **86**:11096-11106.
- 499 36. **Price AM, Dai J, Bazot Q, Patel L, Nikitin PA, Djavadian R, Winter PS, Salinas CA,**  
500 **Barry AP, Wood KC, Johannsen EC, Letai A, Allday MJ, Luftig MA.** 2017. Epstein-  
501 Barr virus ensures B cell survival by uniquely modulating apoptosis at early and late  
502 times after infection. *Elife* **6**.
- 503 37. **Ma SD, Tsai MH, Romero-Masters JC, Ranheim EA, Huebner SM, Bristol JA,**  
504 **Delecluse HJ, Kenney SC.** 2017. Latent Membrane Protein 1 (LMP1) and LMP2A  
505 Collaborate To Promote Epstein-Barr Virus-Induced B Cell Lymphomas in a Cord Blood-  
506 Humanized Mouse Model but Are Not Essential. *J Virol* **91**.
- 507 38. **Ma SD, Xu X, Plowshay J, Ranheim EA, Burlingham WJ, Jensen JL,**  
508 **Asimakopoulos F, Tang W, Gulley ML, Cesarman E, Gumperz JE, Kenney SC.**  
509 2015. LMP1-deficient Epstein-Barr virus mutant requires T cells for lymphomagenesis. *J*  
510 *Clin Invest* **125**:304-315.
- 511 39. **Dolken L, Ruzsics Z, Radle B, Friedel CC, Zimmer R, Mages J, Hoffmann R,**  
512 **Dickinson P, Forster T, Ghazal P, Koszinowski UH.** 2008. High-resolution gene  
513 expression profiling for simultaneous kinetic parameter analysis of RNA synthesis and  
514 decay. *RNA* **14**:1959-1972.
- 515 40. **Wang F, Tsang SF, Kurilla MG, Cohen JI, Kieff E.** 1990. Epstein-Barr virus nuclear  
516 antigen 2 transactivates latent membrane protein LMP1. *J Virol* **64**:3407-3416.
- 517 41. **Schuhmacher M, Kohlhuber F, Holzel M, Kaiser C, Burtscher H, Jarsch M,**  
518 **Bornkamm GW, Laux G, Polack A, Weidle UH, Eick D.** 2001. The transcriptional  
519 program of a human B cell line in response to Myc. *Nucleic Acids Res* **29**:397-406.
- 520 42. **Polack A, Hortnagel K, Pajic A, Christoph B, Baier B, Falk M, Mautner J, Geltinger**  
521 **C, Bornkamm GW, Kempkes B.** 1996. c-myc activation renders proliferation of Epstein-  
522 Barr virus (EBV)-transformed cells independent of EBV nuclear antigen 2 and latent  
523 membrane protein 1. *Proc Natl Acad Sci U S A* **93**:10411-10416.
- 524 43. **Zhou H, Schmidt SC, Jiang S, Willox B, Bernhardt K, Liang J, Johannsen EC,**  
525 **Kharchenko P, Gewurz BE, Kieff E, Zhao B.** 2015. Epstein-Barr virus oncoprotein  
526 super-enhancers control B cell growth. *Cell Host Microbe* **17**:205-216.



- 527 44. **Delmore JE, Issa GC, Lemieux ME, Rahl PB, Shi J, Jacobs HM, Kastiris E,**  
528 **Gilpatrick T, Paranal RM, Qi J, Chesi M, Schinzel AC, McKeown MR, Heffernan TP,**  
529 **Vakoc CR, Bergsagel PL, Ghobrial IM, Richardson PG, Young RA, Hahn WC,**  
530 **Anderson KC, Kung AL, Bradner JE, Mitsiades CS.** 2011. BET bromodomain  
531 inhibition as a therapeutic strategy to target c-Myc. *Cell* **146**:904-917.
- 532 45. **Forte E, Salinas RE, Chang C, Zhou T, Linnstaedt SD, Gottwein E, Jacobs C, Jima**  
533 **D, Li QJ, Dave SS, Luftig MA.** 2012. The Epstein-Barr virus (EBV)-induced tumor  
534 suppressor microRNA MiR-34a is growth promoting in EBV-infected B cells. *J Virol*  
535 **86**:6889-6898.
- 536 46. **Sjoblom-Hallen A, Yang W, Jansson A, Rymo L.** 1999. Silencing of the Epstein-Barr  
537 virus latent membrane protein 1 gene by the Max-Mad1-mSin3A modulator of chromatin  
538 structure. *J Virol* **73**:2983-2993.
- 539 47. **Rowe M, Khanna R, Jacob CA, Argat V, Kelly A, Powis S, Belich M, Croom-Carter**  
540 **D, Lee S, Burrows SR, et al.** 1995. Restoration of endogenous antigen processing in  
541 Burkitt's lymphoma cells by Epstein-Barr virus latent membrane protein-1: coordinate up-  
542 regulation of peptide transporters and HLA-class I antigen expression. *Eur J Immunol*  
543 **25**:1374-1384.
- 544 48. **Staege MS, Lee SP, Frisan T, Mautner J, Scholz S, Pajic A, Rickinson AB, Masucci**  
545 **MG, Polack A, Bornkamm GW.** 2002. MYC overexpression imposes a  
546 nonimmunogenic phenotype on Epstein-Barr virus-infected B cells. *Proc Natl Acad Sci U*  
547 *S A* **99**:4550-4555.
- 548 49. **Brooks JM, Lee SP, Leese AM, Thomas WA, Rowe M, Rickinson AB.** 2009. Cyclical  
549 expression of EBV latent membrane protein 1 in EBV-transformed B cells underpins  
550 heterogeneity of epitope presentation and CD8+ T cell recognition. *J Immunol* **182**:1919-  
551 1928.
- 552 50. **Albanese M, Tagawa T, Bouvet M, Maliqi L, Lutter D, Hoser J, Hastreiter M, Hayes**  
553 **M, Sugden B, Martin L, Moosmann A, Hammerschmidt W.** 2016. Epstein-Barr virus  
554 microRNAs reduce immune surveillance by virus-specific CD8+ T cells. *Proc Natl Acad*  
555 *Sci U S A* **113**:E6467-E6475.
- 556 51. **Tagawa T, Albanese M, Bouvet M, Moosmann A, Mautner J, Heissmeyer V,**  
557 **Zielinski C, Lutter D, Hoser J, Hastreiter M, Hayes M, Sugden B, Hammerschmidt**  
558 **W.** 2016. Epstein-Barr viral miRNAs inhibit antiviral CD4+ T cell responses targeting IL-  
559 12 and peptide processing. *J Exp Med* **213**:2065-2080.
- 560 52. **Johannsen E, Luftig M, Chase MR, Weickel S, Cahir-McFarland E, Illanes D,**  
561 **Sarracino D, Kieff E.** 2004. Proteins of purified Epstein-Barr virus. *Proc Natl Acad Sci U*  
562 *S A* **101**:16286-16291.
- 563 53. **Payne TL, Blackinton J, Frisbee A, Pickeral J, Sawant S, Vandergrift NA, Freel SA,**  
564 **Ferrari G, Keene JD, Tomaras GD.** 2014. Transcriptional and posttranscriptional  
565 regulation of cytokine gene expression in HIV-1 antigen-specific CD8+ T cells that  
566 mediate virus inhibition. *J Virol* **88**:9514-9528.

567

568

569 **FIGURES and FIGURE LEGENDS**

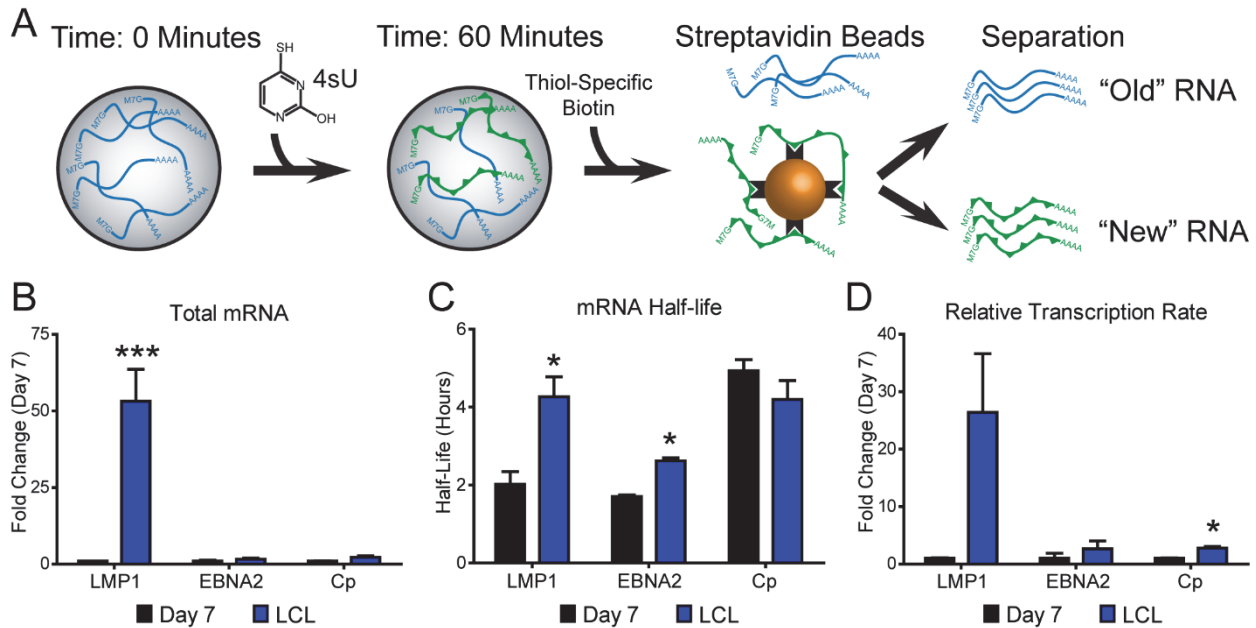

570

571 **Figure 1. 4sU metabolic pulsing reveals differences in LMP1 mRNA abundance, half-life**  
572 **and transcription rate at Day 7 compared to LCL** (A) Schematic describing 4sU experiments.  
573 Cells are pulsed for 1 hour with 4sU before RNA isolation by Trizol. 4sU labeled RNA is then  
574 conjugated to biotin and isolated via magnetic streptavidin. Unbound RNA is saved as the “old”  
575 fraction while bound RNA eluted from the beads becomes the “new” fraction. Isolated RNA is then  
576 reverse transcribed for RT-qPCR analysis. (B) RT-qPCR analysis of total mRNA from 4sU  
577 experiments for indicated genes at indicated times post infection. (C) RT-qPCR analysis of mRNA  
578 half-life from 4sU experiments. Half-life is normalized to GAPDH. (D) Transcription rate analysis  
579 of mRNA from 4sU experiments for indicated genes at indicated times post infection. All  
580 transcription rates are relative to GAPDH. For all panels, Cp denotes EBV C promoter transcripts.  
581 Each bar is representative of at least 3 independent donors. Error bars represent SEM. \* denotes  
582  $p < 0.05$ , \*\* denotes  $p < 0.01$  and \*\*\* denotes  $p < 0.001$  by one-tailed pairwise student’s t-test.

583

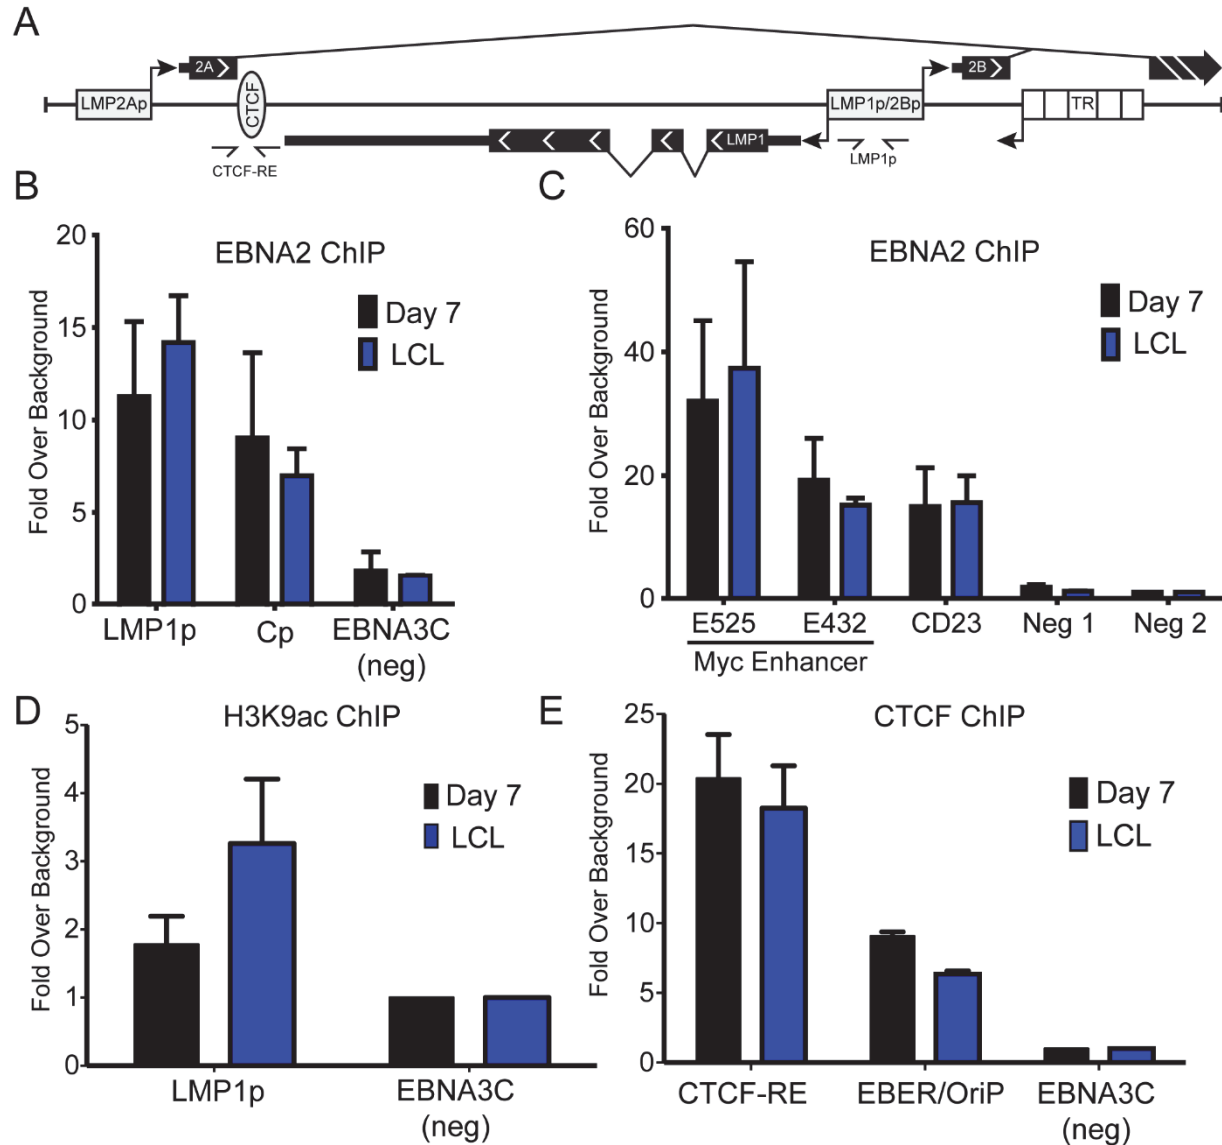

584  
 585 **Figure 2. Interrogation of the LMP1 locus by ChIP-PCR.** (A) Schematic of the LMP1 genomic  
 586 locus. Arrows with half arrow heads denote the location of primers used for ChIP-PCR in (B), (D)  
 587 and (E). (B) Sorted Day 7 proliferating primary EBV-infected B cells (black) or fully outgrown (>35  
 588 days) LCLs (blue) were harvested for chromatin and ChIP for EBNA2 was performed. LMP1p  
 589 denotes the LMP1 promoter, Cp denotes the C promoter and EBNA3C is an EBV genomic  
 590 negative control. All samples are normalized to the average of the two negative controls from the  
 591 human genome in (C). (C) Same experiment as in (B) but RT-qPCR was performed for regions  
 592 of the human genome. Neg1 and Neg2 denote transcription factor deserts within the human  
 593 genome serving as a negative control. All samples are normalized to the average of the two  
 594 negative controls. (D) Similar experiment as in (B) but ChIP was performed for H3K9ac. All  
 595 samples are normalized to EBNA3C. (E) Similar experiments as in (B) but ChIP was performed  
 596 for CTCF. CTCF-RE denotes the CTCF binding site in the LMP1 locus (panel A), EBER/OriP  
 597 denotes a known CTCF binding site by EBER/OriP. For all panels, all bars represent the average  
 598 of at least 3 independent donors. All error bars represent SEM.



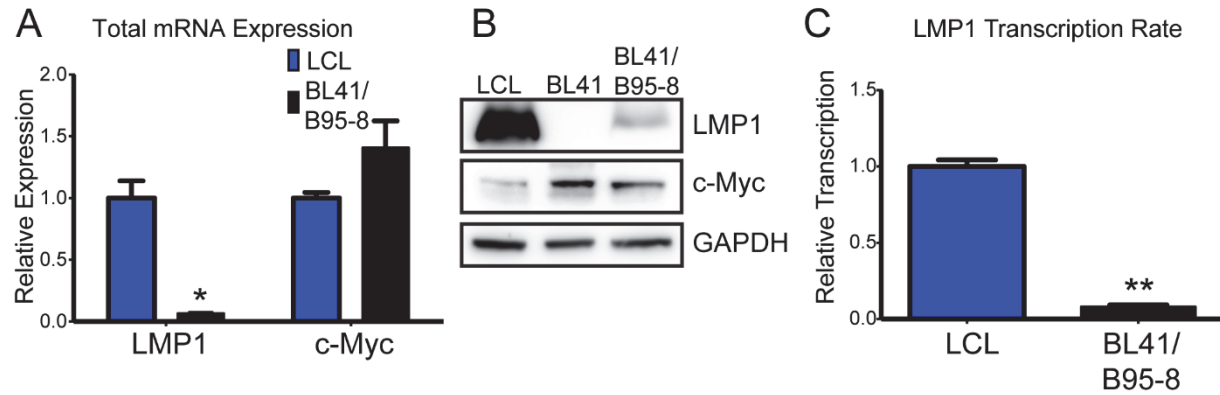

599

600

601 **Figure 3. Increased c-Myc in BL41/B95-8 correlates with decreased LMP1 mRNA**

602 **abundance, transcription rate and protein.** (A) RT-qPCR analysis for total mRNA from fully

603 immortalized (>35 days) LCLs or BL41/B95-8 for indicated genes. All values are normalized to

604 SETDB1. (B) Western blot analysis for indicated proteins in LCL, EBV negative BL41 and BL41

605 re-infected with EBV, BL41/B95-8. (C) Relative transcription rate from 4sU metabolic labeling of

606 LMP1 mRNA transcription rate in LCL and BL41/B95-8. All values are relative to GAPDH. For

607 each panel, each bar is representative of 3 independent donors/experiments. All error bars

608 represent SEM. \* denotes  $p < 0.05$  and \*\* denotes  $p < 0.01$  by one tailed student's pairwise t-test.

608

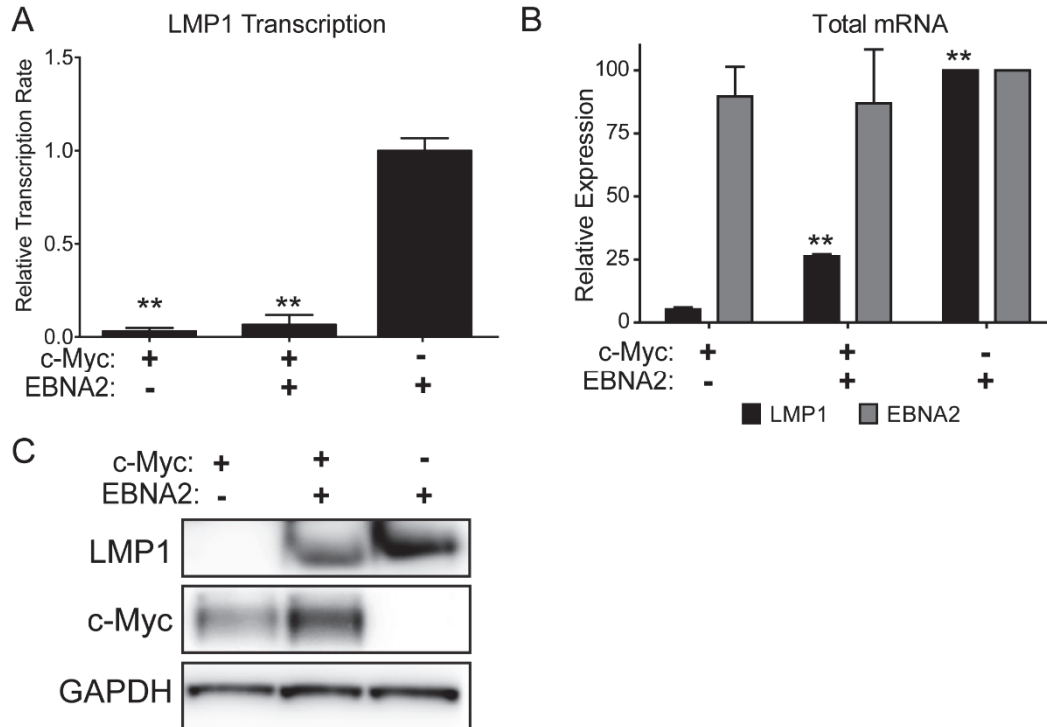

609 **Figure 4. P493-6 system reveals c-Myc inhibits LMP1 transcription and protein expression.**  
 610 (A) RT-qPCR analysis of LMP1 mRNA transcription rate from 4sU metabolic labeling experiments  
 611 in P493-6 cells in the indicated transcriptional states. All values are normalized to the “LCL” state.  
 612 (B) RT-qPCR analysis for total LMP1 and EBNA2 mRNA from 4sU metabolic labeling experiments  
 613 in P493-6 cells in the indicated transcriptional states. All values are normalized to the “LCL” state.  
 614 (C) Western Blot analysis for LMP1 and c-Myc protein of the P493-6 cells grown in the indicated  
 615 transcriptional states. For all panels, each bar is representative of at least 3 independent  
 616 experiments. All error bars denote SEM. \*\* denotes  $p < 0.01$  by one tailed student’s pairwise t-test.

617

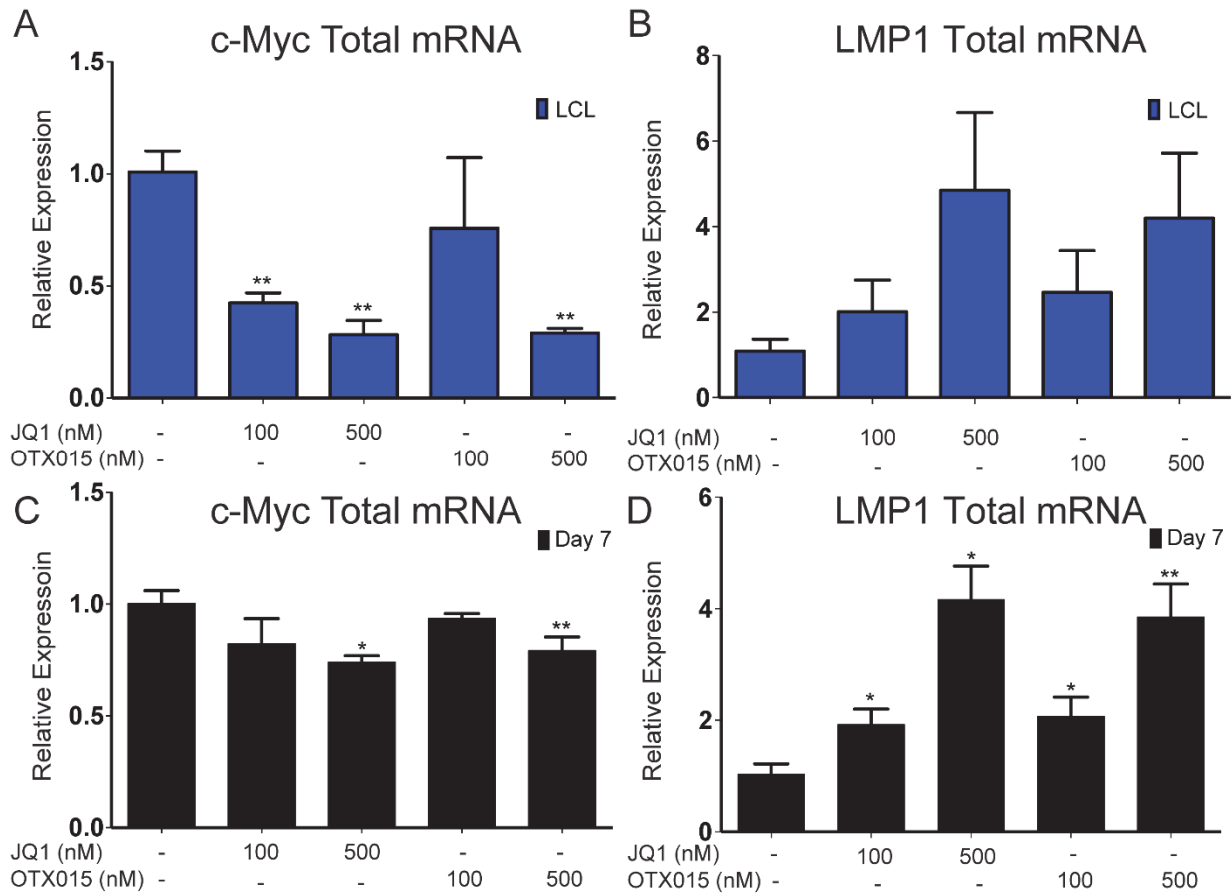

618

619 **Figure 5. BET inhibition results in a dose dependent increase in LMP1 and simultaneous**  
 620 **decrease in c-Myc mRNA in both primary EBV infected B cells and LCLs.** (A) LCLs were  
 621 treated with the indicated concentrations of either JQ1 or OTX015 or 0.1% DMSO for 24 hours  
 622 before total mRNA was harvested for RT-qPCR analysis for c-Myc. (B) Similar experiments as in  
 623 (A) but RT-qPCR was performed for LMP1. (C) Peripheral blood mononuclear cells (PBMCs)  
 624 were isolated from whole blood and infected with EBV. On day 7, they were treated with the  
 625 indicated concentrations of JQ1 or OTX015 or 0.1% DMSO for 24 hours before total mRNA was  
 626 collected for RT-qPCR analysis for c-Myc. (D) Similar experiments as in (C) but RT-qPCR was  
 627 performed for LMP1. For all panels, each bar represents the average of 3 independent donors.  
 628 All error bars denote SEM. \* denotes  $p < 0.05$  and \*\* denotes  $p < 0.01$  by one tailed student's  
 629 pairwise t-test.
